# Supplementary material for: Two-dimensional MoSi2As4-based field-effect transistors integrating switching and gas-sensing functions
Source: Royal Society of Chemistry journal article supplement (doi:10.1039/d3nr00637a), 2023-01-01
Supplement: d3nr00637a1.pdf [file d3nr00637a1.pdf]

## Electronic Supplementary Information

### Two-dimensional MoSi<sub>2</sub>As<sub>4</sub>-based field-effect transistors

#### integrating switching and gas sensing functions

Mi-Mi Dong, Hang He, Chuan-Kui Wang\*, Xiao-Xiao Fu\*

*Shandong Key Laboratory of Medical Physics and Image Processing & Shandong Provincial Engineering and Technical Center of Light Manipulations, School of Physics and Electronics, Shandong Normal University, Jinan 250358, China*

\*E-mail: [ckwang@sdu.edu.cn](mailto:ckwang@sdu.edu.cn); [fuxiaoxiao@sdu.edu.cn](mailto:fuxiaoxiao@sdu.edu.cn)

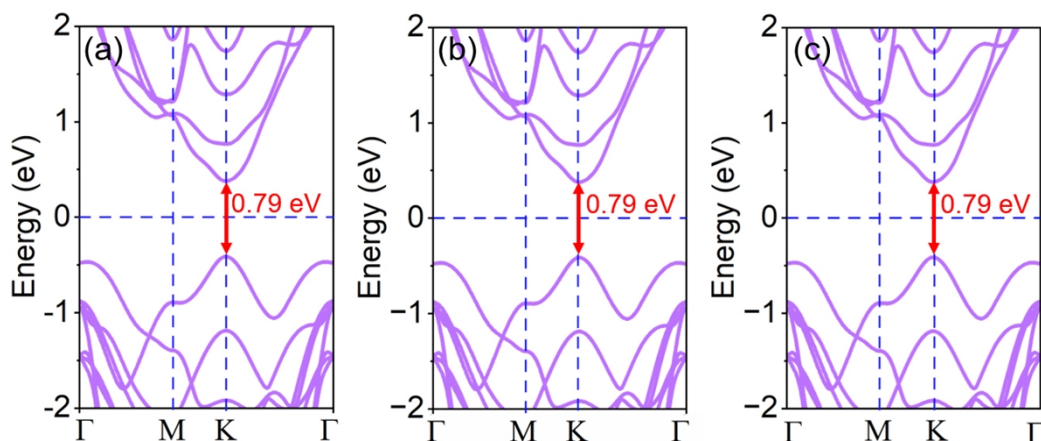

Figure S1. The band structure of monolayer MoSi<sub>2</sub>As<sub>4</sub> with the  $k$ -point samplings of (a)  $33 \times 1 \times 33$ , (b)  $35 \times 1 \times 35$ , and (c)  $37 \times 1 \times 37$ , respectively.

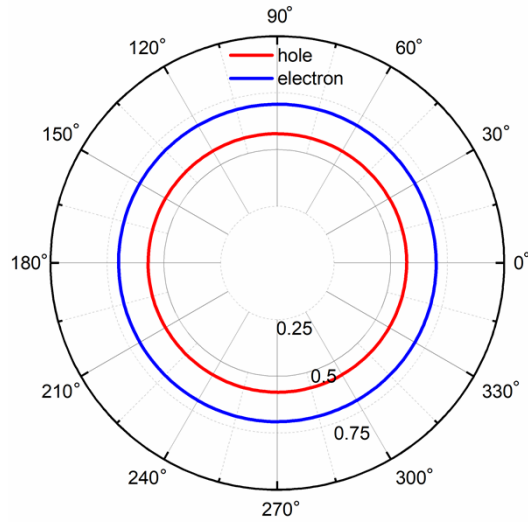

Figure S2. Polar plot of the electron and hole effective mass for the  $\text{MoSi}_2\text{As}_4$  monolayer;  $0^\circ$  and  $90^\circ$  represent the zigzag and armchair directions, respectively.

Table S1. The effective mass ( $m^*$ ) and carrier mobility ( $\mu$ ) of the monolayer  $\text{MoSi}_2\text{As}_4$ .  $m_0$  is the electron mass.

|                            | Carrier type | $m^* (m_0)$ | $\mu (\text{cm}^2\text{V}^{-1}\text{s}^{-1})$ |
|----------------------------|--------------|-------------|-----------------------------------------------|
| $\text{MoSi}_2\text{As}_4$ | electron     | 0.70        | 243                                           |
|                            | hole         | 0.57        | 1050                                          |

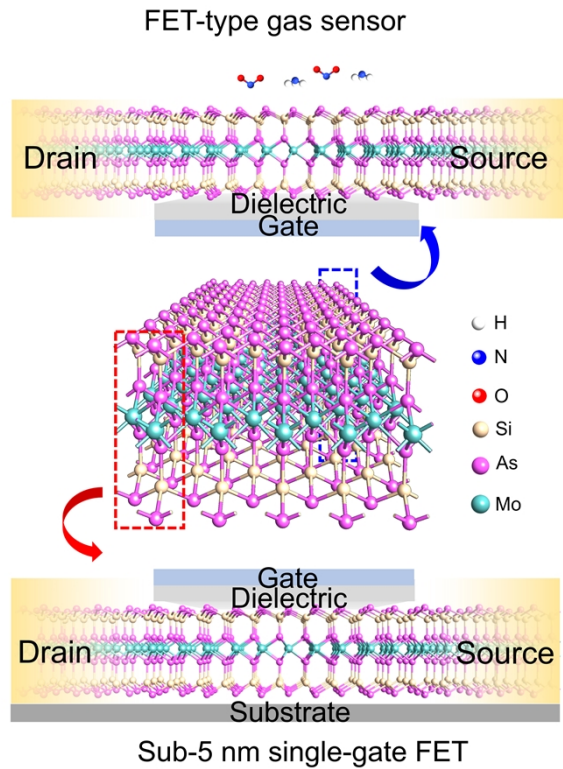

Figure S3. The schematic diagram of the  $\text{MoSi}_2\text{As}_4$ -based FET and FET-type gas sensor.

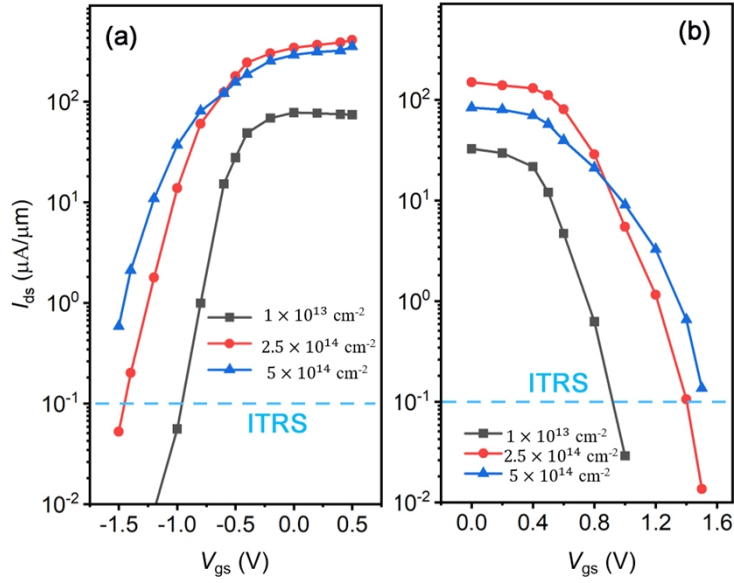

Figure S4. The transfer characteristics of SG (a) *n*-type and (b) *p*-type 5 nm gate-length MoSi<sub>2</sub>As<sub>4</sub> FET without underlap structure at different doping concentration.

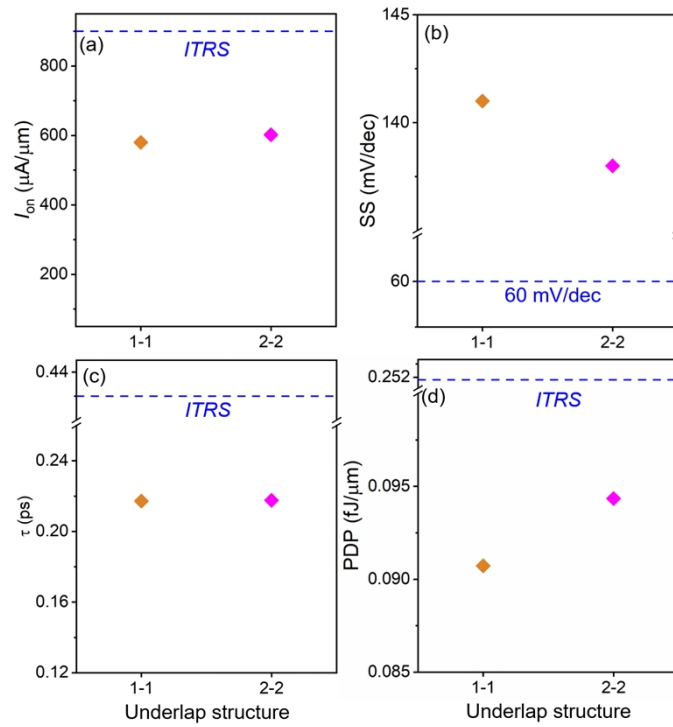

Figure S5. (a) On-state current ( $I_{on}$ ), (b) subthreshold swing (SS), (c) delay time ( $\tau$ ), and (d) power dissipation (PDP) of SG *n*-type 5 nm gate-length MoSi<sub>2</sub>As<sub>4</sub> FET with different underlap structures. The blue dashed lines represent the ITRS for HP requirements. The underlap structures “N-N” represent the parts of  $UL_1 = UL_2 = N$  nm.

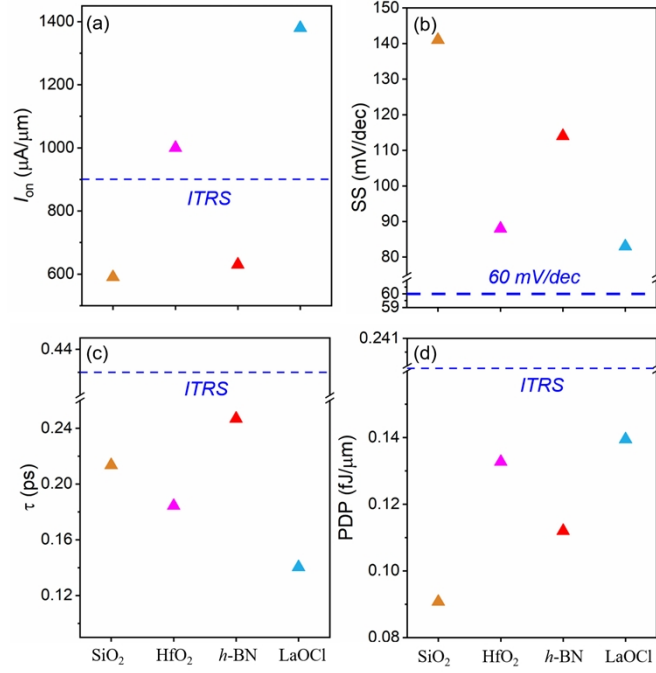

Figure S6. (a) On-state current ( $I_{on}$ ), (b) subthreshold swing (SS), (c) delay time ( $\tau$ ), and (d) power dissipation (PDP) of SG *n*-type 5 nm gate-length MoSi<sub>2</sub>As<sub>4</sub> FET with SiO<sub>2</sub>/ HfO<sub>2</sub>/h-BN/LaOCl dielectric material. The blue dashed lines represent the ITRS for HP requirements.

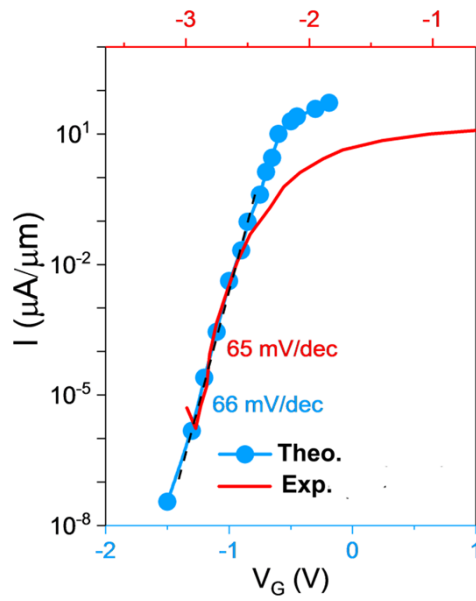

Figure S7. Benchmark of the simulated transfer characteristic against the experimental one for the 1 nm gate-length 2D MoS<sub>2</sub> transistors.<sup>1</sup>

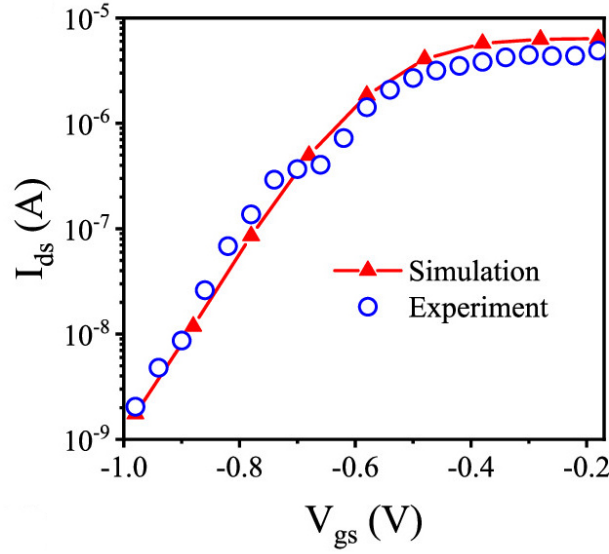

Figure S8. Experimental transfer characteristic of the 1.3 nm-diameter CNT FET with 5 nm gate length against the simulated data based on first-principles quantum transport calculations of the single-gate (8, 0) CNT-based FET.<sup>2</sup>

Table S2. The comparison of the performance of the FETs between the experiments and theories using the DFT+NEGF method. The theoretical results represent the performance limit of the FETs. SS: subthreshold swing;  $I_{\text{off}}$  and  $I_{\text{on}}$  are the off-state and on-state current;  $\tau$ : delay time; PDP: power dissipation; EDP: energy-delay product.

| Channel material | Gate length | Performance                                    | Method     | Value                 | Reference |
|------------------|-------------|------------------------------------------------|------------|-----------------------|-----------|
| MoS <sub>2</sub> | 1 nm        | SS (mV/dec)                                    | Experiment | 65                    | 1, 3, 4   |
|                  |             |                                                | DFT+NEGF   | 66                    |           |
|                  |             | $I_{\text{on}}$ ( $\mu\text{A}/\mu\text{m}$ )  | Experiment | 250                   |           |
|                  |             |                                                | DFT+NEGF   | 519                   |           |
| Carbon nanotube  | 5 nm        | $I_{\text{off}}$ ( $\mu\text{A}/\mu\text{m}$ ) | Experiment | 50                    | 2, 5      |
|                  |             |                                                | DFT+NEGF   | 50                    |           |
|                  |             | $I_{\text{on}}$ ( $\mu\text{A}/\mu\text{m}$ )  | Experiment | 1412                  |           |
|                  |             |                                                | DFT+NEGF   | 1775                  |           |
|                  |             | $\tau$ (fs)                                    | Experiment | 46                    |           |
|                  |             |                                                | DFT+NEGF   | 26                    |           |
|                  |             | PDP (fJ/ $\mu\text{m}$ )                       | Experiment | 0.026                 |           |
|                  |             |                                                | DFT+NEGF   | 0.018                 |           |
|                  |             | EDP (Js/ $\mu\text{m}$ )                       | Experiment | $1.2 \times 10^{-30}$ |           |
|                  |             |                                                | DFT+NEGF   | $0.5 \times 10^{-30}$ |           |

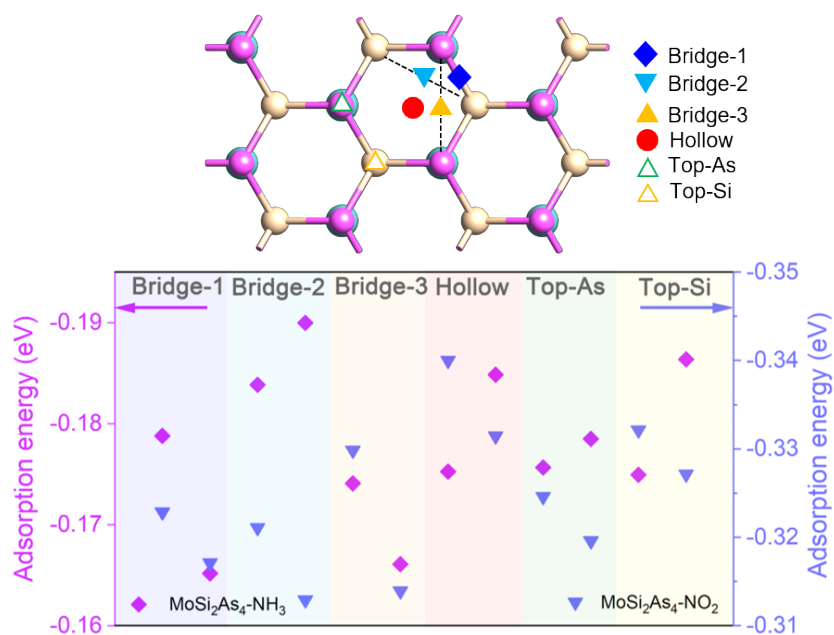

Figure S9. The adsorption sites and adsorption energy of the  $\text{NH}_3$  and  $\text{NO}_2$  adsorbed  $\text{MoSi}_2\text{As}_4$ .

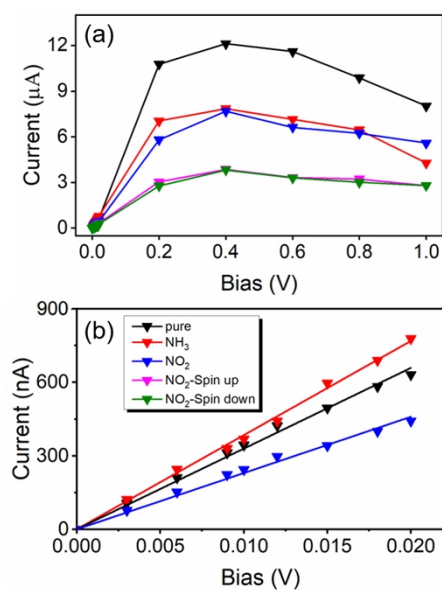

Figure S10. (a) The current as a function of bias voltage and (b) the current as a function of bias voltage within a low bias range of the  $\text{MoSi}_2\text{As}_4$  sensor before and after adsorbing of  $\text{NH}_3$  or  $\text{NO}_2$ .

## References

1. Y. Wang, R. Fei, R. Quhe, J. Li, H. Zhang, X. Zhang, B. Shi, L. Xiao, Z. Song, J. Yang, J. Shi, F. Pan and J. Lu, *ACS Appl. Mater. Interfaces*, 2018, **10**, 23344-23352.

2. L. Xu, J. Yang, C. Qiu, S. Liu, W. Zhou, Q. Li, B. Shi, J. Ma, C. Yang, J. Lu and Z. Zhang, *ACS Appl. Mater. Interfaces*, 2021, **13**, 31957-31967.
3. S. B. Desai, S. R. Madhvapathy, A. B. Sachid, J. P. Llinas, Q. Wang, G. H. Ahn, G. Pitner, M. J. Kim, J. Bokor, C. Hu, H.-S. P. Wong and A. Javey, *Science*, 2016, **354**, 99-102.
4. R. Quhe, L. Xu, S. Liu, C. Yang, Y. Wang, H. Li, J. Yang, Q. Li, B. Shi, Y. Li, Y. Pan, X. Sun, J. Li, M. Weng, H. Zhang, Y. Guo, L. Xu, H. Tang, J. Dong, J. Yang, Z. Zhang, M. Lei, F. Pan and J. Lu, *Phys. Rep.*, 2021, **938**, 1-72.
5. C. Qiu, Z. Zhang, M. Xiao, Y. Yang, D. Zhong and L.-M. Peng, *Science*, 2017, **355**, 271-276.
